# Supplementary material for: Altered cellular and humoral immune responses following SARS-CoV-2 mRNA vaccination in patients with multiple sclerosis on anti-CD20 therapy
Source: bioRxiv or medRxiv preprint supplement (doi:10.1101/2021.06.23.21259389), 2021-06-30

**Supplementary Table 1.**

|                                                                        | <b>MS (n=20)</b>      | <b>HC (n=10)</b> | <i>p</i> - value |
|------------------------------------------------------------------------|-----------------------|------------------|------------------|
| <b>Age</b> , mean years± SD (range)                                    | 40.35±8.44 [27-57]    | 35.2±9.8 [25-61] | p=0.146          |
| <b>Females</b> , n (%)                                                 | 15 (75)               | 6 (60)           | p=0.431          |
| <b>Relapsing Remitting MS</b> , n (%)                                  | 21(100)               | -                |                  |
| <b>Vaccine type</b>                                                    |                       |                  |                  |
| Pfizer, n (%)                                                          | 12 (61.9)             | 8 (80)           | p=0.419          |
| Moderna, n (%)                                                         | 8 (38.1)              | 2 (20)           |                  |
| <b>Time from last aCD20 to first vaccine (weeks)</b> , mean±SD [range] | 19.77±9.52 [2.6-41.1] | -                |                  |
| <b>Prior cycles of aCD20</b> , mean±SD [range]                         | 3.2±1.6 [1-7]         | -                |                  |
| <b>Type of aCD20</b>                                                   |                       |                  |                  |
| Ocrelizumab, n (%)                                                     | 19 (95)               | -                |                  |
| Rituximab, n (%)                                                       | 1 (5)                 | -                |                  |
| <b>EDSS</b> , mean±SD [range]                                          | 1.5±2.2 (0-6.5)       | -                |                  |

**Supplementary Table 1.** MS-aCD20 and HC cohort Demographics.

**Supplementary Table 2.**

|                        | <b>HC</b> | <b>MS-<math>\alpha</math>CD20</b> | <b><i>p</i> - value</b> |
|------------------------|-----------|-----------------------------------|-------------------------|
| <b>anti-Spike IgG</b>  |           |                                   |                         |
| T2                     | 100%      | 28.57%                            | 0.0006                  |
| T3                     | 100%      | 29.41%                            | 0.0004                  |
| T4                     | 100%      | 82.35%                            | 0.2735                  |
| T5                     | 100%      | 88.89%                            | 0.5238                  |
| <b>RBD Protein IgG</b> |           |                                   |                         |
| T2                     | 60%       | 7.14%                             | 0.0088                  |
| T3                     | 100%      | 17.65%                            | <0.0001                 |
| T4                     | 100%      | 41.48%                            | 0.0031                  |
| T5                     | 100%      | 50%                               | 0.0098                  |

**Supplementary Table 2.** Anti-Spike and anti-RBD IgG serological positivity rates in HC and MS- $\alpha$ CD20 patients across different time points. Two-sided Fisher's exact test.

**Supplementary Table 3.**

| Antigen-specific memory B cells | Timepoint | Comparison     | p - value | method   |
|---------------------------------|-----------|----------------|-----------|----------|
| Spike <sup>+</sup>              | T2        | HC vs MS-aCD20 | 9.20E-06  | Wilcoxon |
| Spike <sup>+</sup>              | T3        | HC vs MS-aCD20 | 1.10E-05  | Wilcoxon |
| Spike <sup>+</sup>              | T4        | HC vs MS-aCD20 | 2.60E-05  | Wilcoxon |
| Spike <sup>+</sup>              | T5        | HC vs MS-aCD20 | 1.10E-05  | Wilcoxon |
| RBD <sup>+</sup>                | T2        | HC vs MS-aCD20 | 5.50E-06  | Wilcoxon |
| RBD <sup>+</sup>                | T3        | HC vs MS-aCD20 | 3.30E-06  | Wilcoxon |
| RBD <sup>+</sup>                | T4        | HC vs MS-aCD20 | 1.50E-05  | Wilcoxon |
| RBD <sup>+</sup>                | T5        | HC vs MS-aCD20 | 8.70E-06  | Wilcoxon |

**Supplementary Table 3.** The frequencies of Spike<sup>+</sup> and RBD<sup>+</sup> antigen-specific memory B cells were compared between HC and MS-aCD20 groups at each timepoint. Wilcoxon signed-rank testing was used, and the *p* values are shown.

**Supplementary Table 4.**

| <b>Antibody reactivity</b> | <b>Fluorochrome Conjugation</b> | <b>Clone</b> | <b>Supplier</b> | <b>Catalog #</b> |
|----------------------------|---------------------------------|--------------|-----------------|------------------|
| CD27                       | BUV 395                         | L128         | BD              | 563815           |
| CD71                       | BUV 496                         | M-A712       | BD              | 750652           |
| CD3                        | BUV 563                         | UCHT1        | BD              | 748569           |
| CD8                        | BUV 615                         | RPA-T8       | BD              | 751518           |
| CD38                       | BUV 661                         | HIT2         | BD              | 612969           |
| CCR6                       | BUV 737                         | 11A9         | BD              | 612780           |
| HLA-DR                     | BUV 805                         | G46-6        | BD              | 748338           |
| CTLA4                      | BV 421                          | BNI3         | BD              | 562743           |
| PD-1                       | BV 480                          | EH12.11      | BD              | 566112           |
| CCR7                       | BV 510                          | G043H7       | Biolegend       | 353232           |
| Zombie Yellow              | BV 570                          | -            | Biolegend       | 423103           |
| CD45RA                     | BV 605                          | HI100        | Biolegend       | 304134           |
| CD25                       | BV 650                          | M-A251       | BD              | 563719           |
| CXCR3                      | BV 711                          | G025H7       | Biolegend       | 353732           |
| CD4                        | BV 750                          | SK3          | BD              | 566355           |
| ICOS                       | BV 785                          | C398.4A      | Biolegend       | 313534           |
| SLAM                       | AF 488                          | A12 (7D4)    | Biolegend       | 306312           |
| CD127                      | BB 700                          | HIL-7R-M21   | BD              | 566398           |
| CXCR4                      | PE-Cy5                          | 12G5         | Biolegend       | 306508           |
| FoxP3                      | PE-Cy5.5                        | PCH101       | Fisher          | 35-4776-42       |
| Ki67                       | PE-Cy7                          | B56          | BD              | 561283           |
| T-bet                      | AF 647                          | 4B10         | Biolegend       | 644804           |
| CXCR5                      | APC-R700                        | RF8B2        | BD              | 565191           |
| Bcl-6                      | APC-Cy7                         | K112-91      | BD              | 563581           |

**Supplementary Table 4.** Antibody specifications used for FACS-based high-dimensional analysis.

# Extended Data Figure 1.

**A**

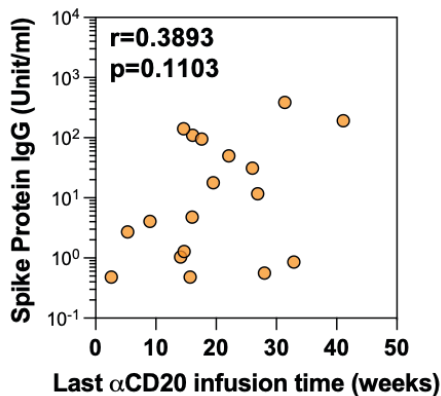

**B**

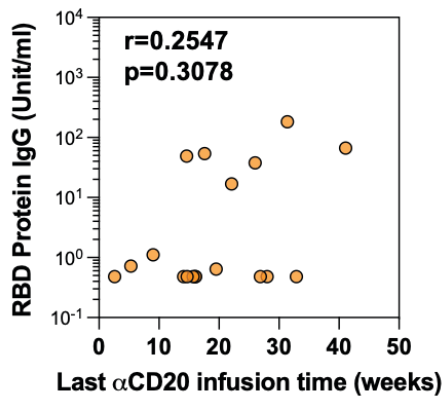

**C**

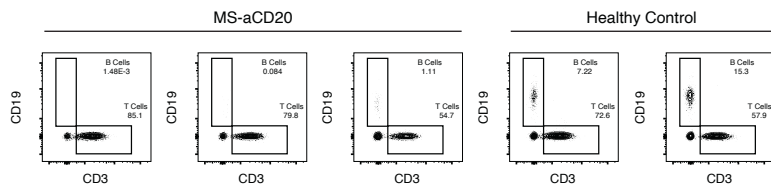

**D**

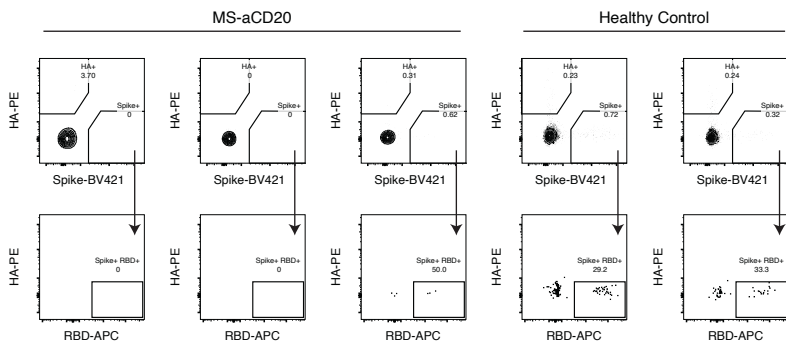

# Extended Data Figure 2.

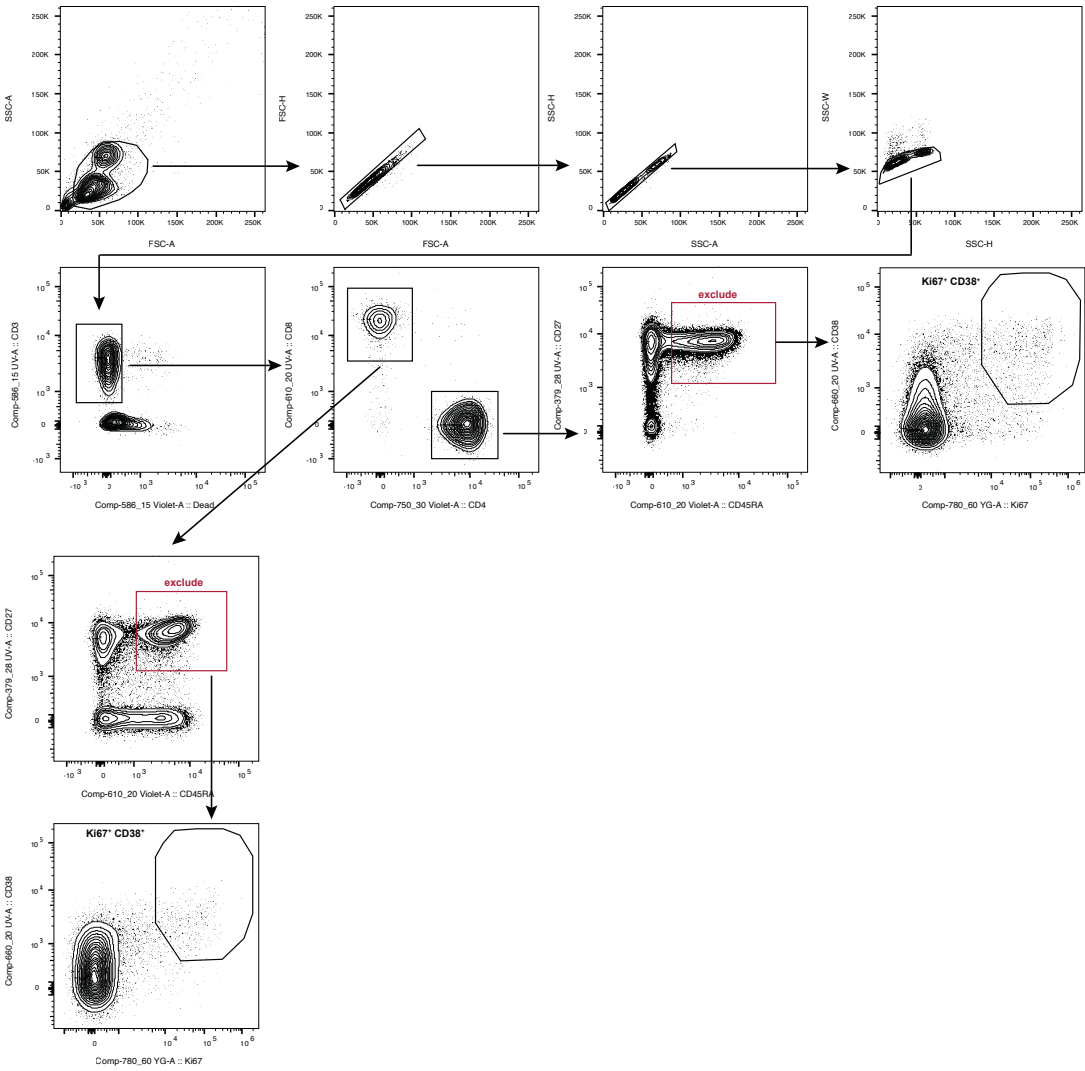

A

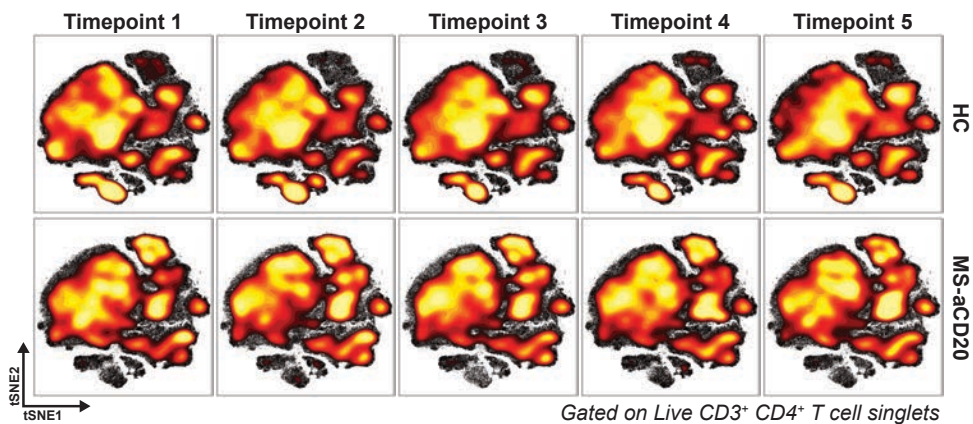

B

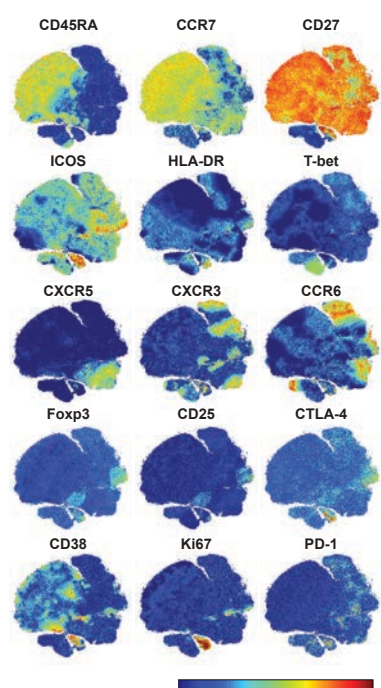

C

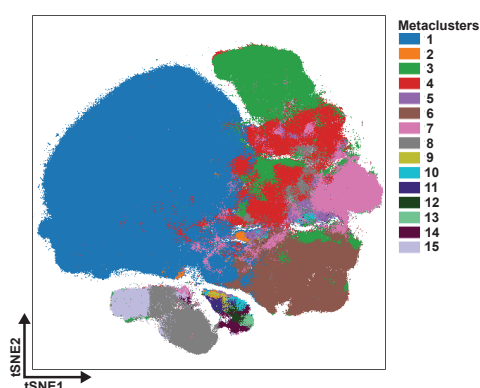

D

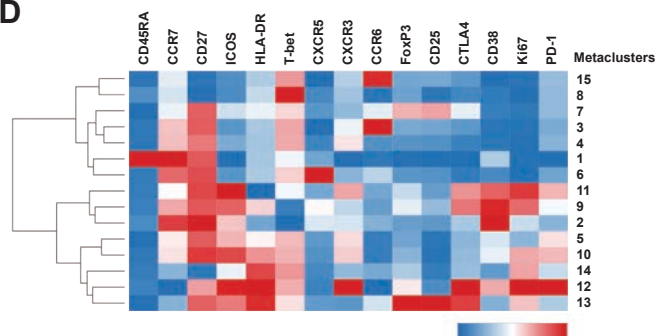

E

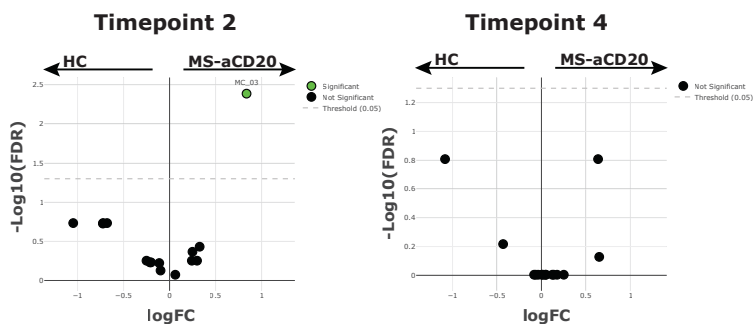

# Extended Data Figure 4.

**A**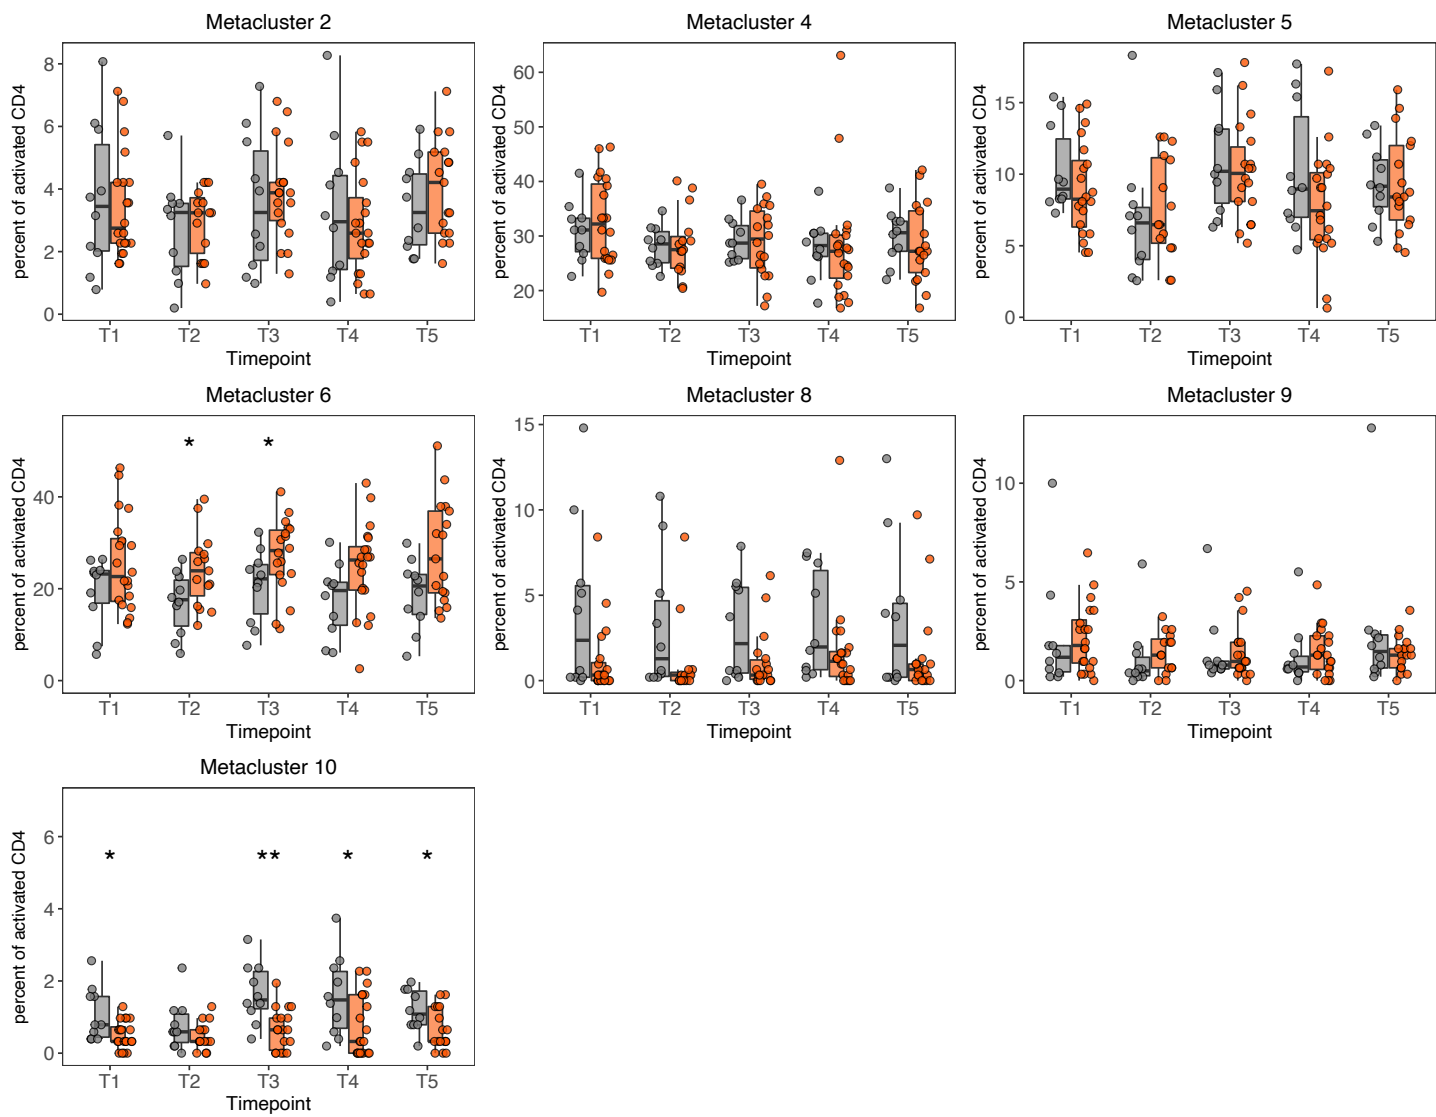**B**

## Metacluster 3

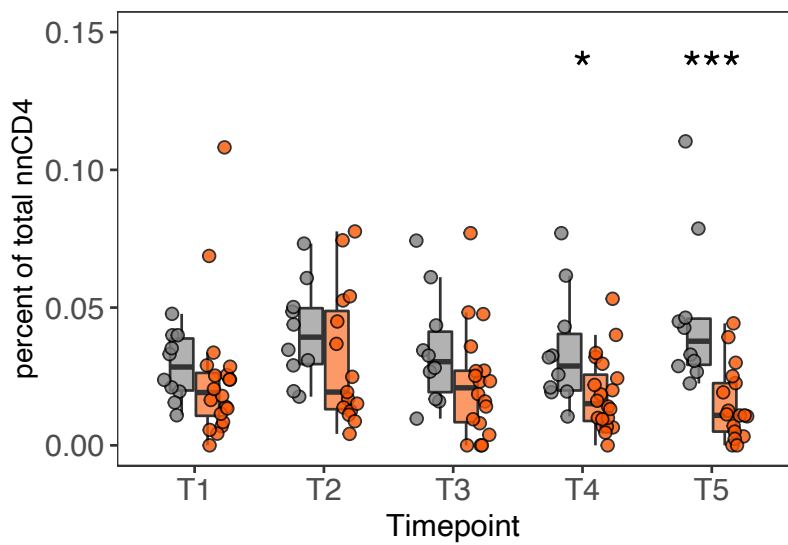



**A**

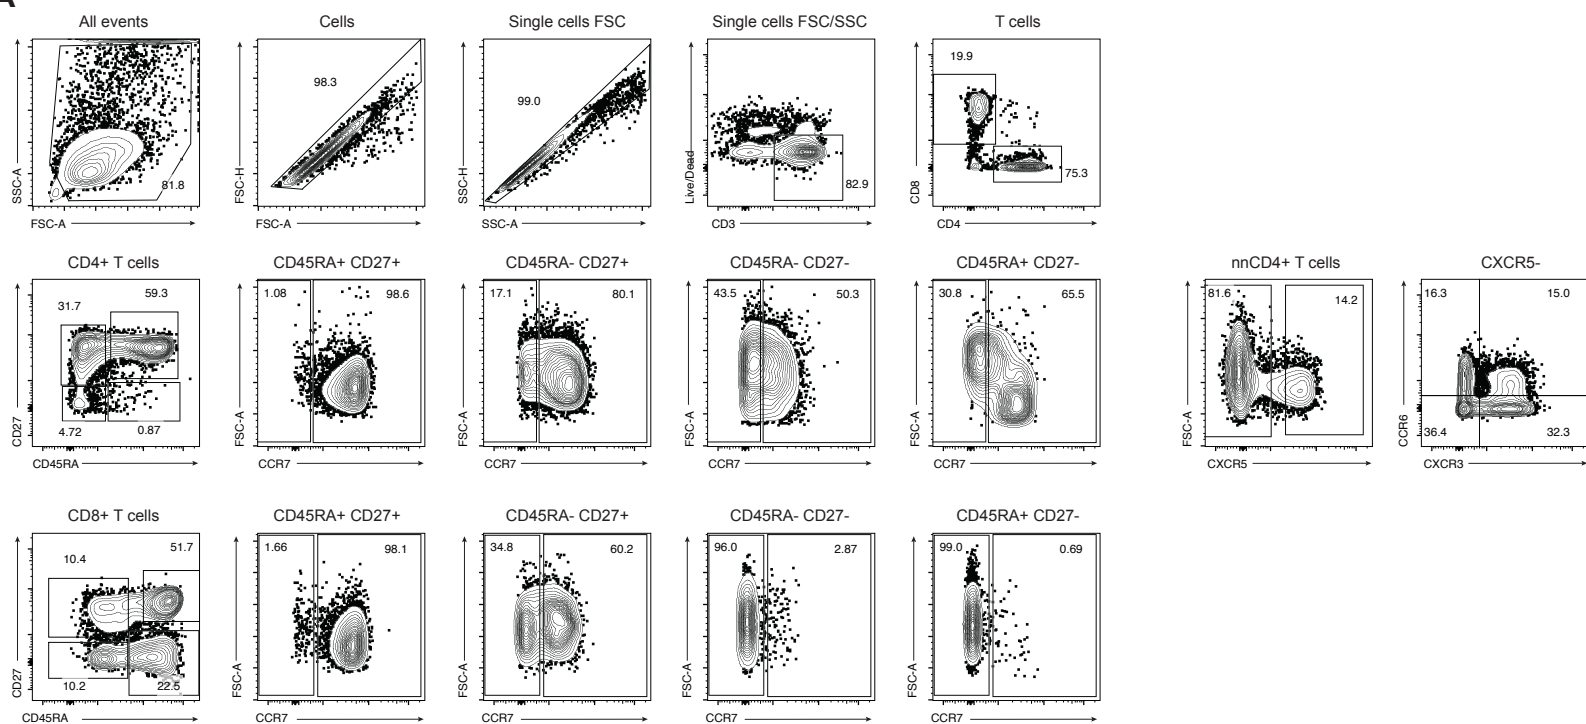

**B**

CD4+ AIM+ (CD200 & CD40L)

CD8+ AIM+ (IFN $\gamma$  & 41BB)

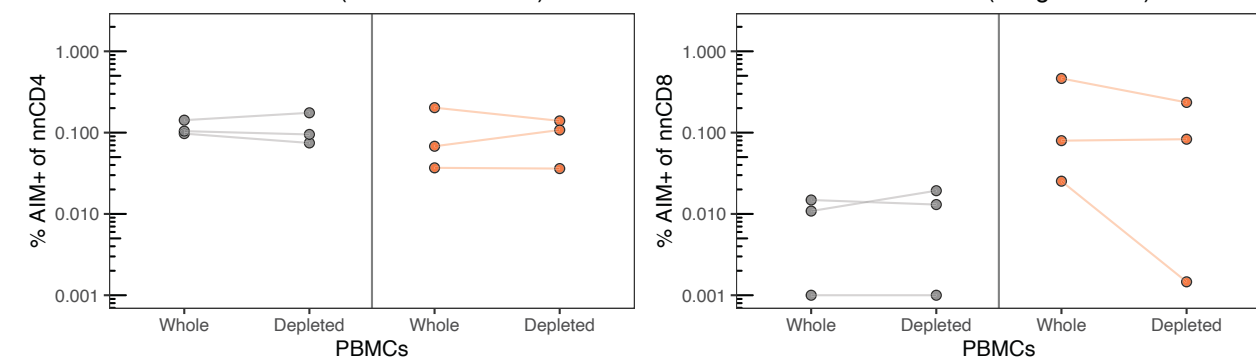

**C**

Healthy total non-naïve CD4+

Healthy total non-naïve CD4+

MS-aCD20 total non-naïve CD4+

MS-aCD20 total non-naïve CD4+

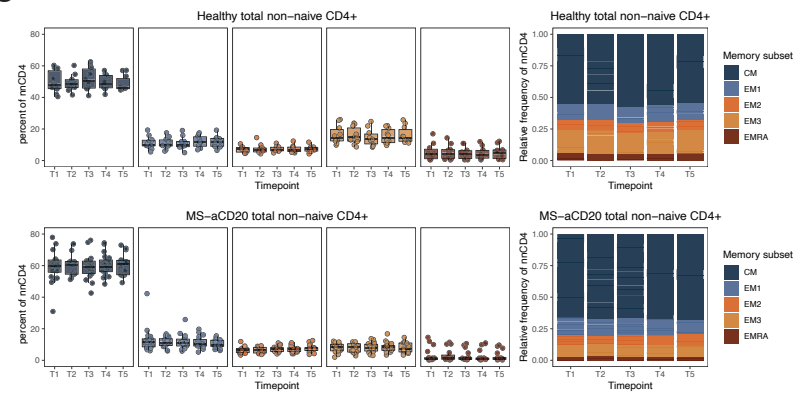

AIM+ Th1

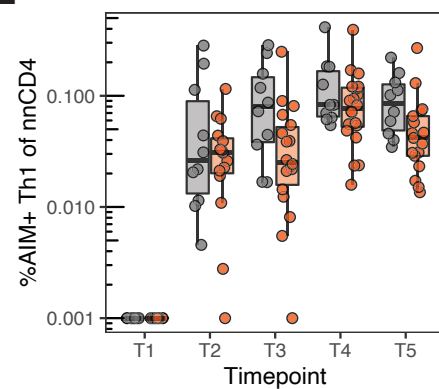

**D**

Healthy total non-naïve CD4+

Healthy total non-naïve CD4+

MS-aCD20 total non-naïve CD4+

MS-aCD20 total non-naïve CD4+

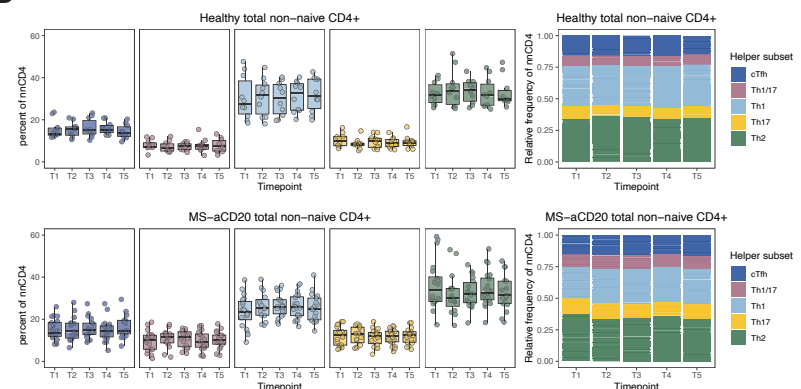

AIM+ Tfh

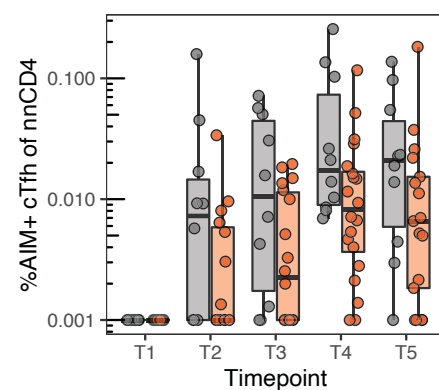

# Extended Data Figure 6.

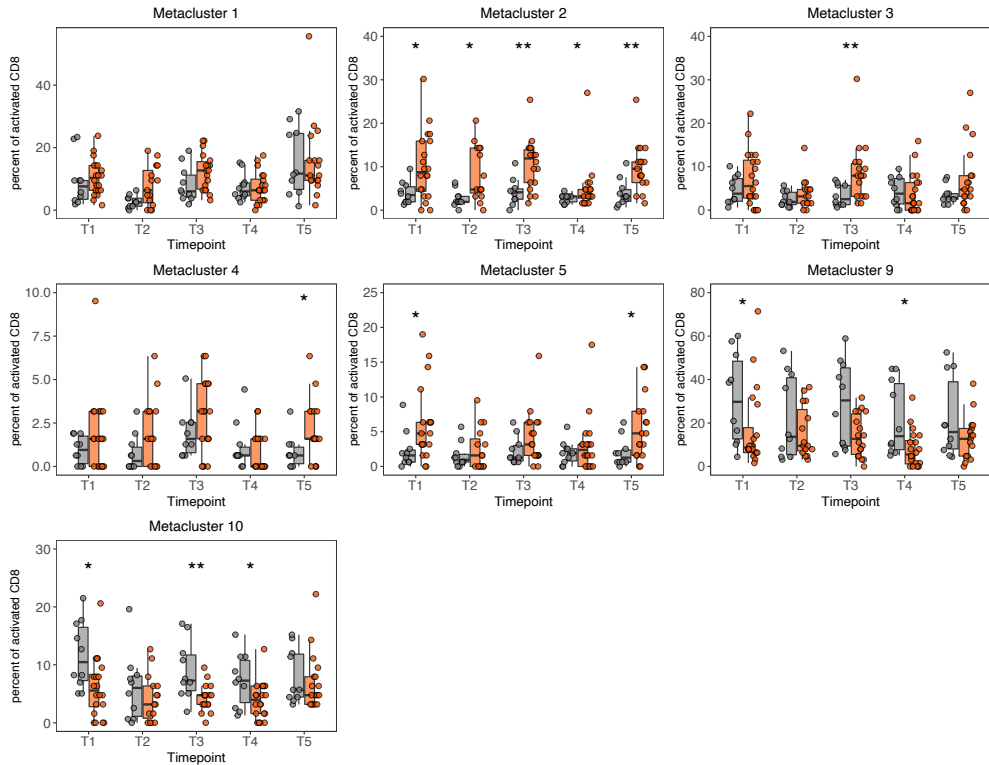

# Extended Data Figure 7.

Healthy total non-naïve CD8+

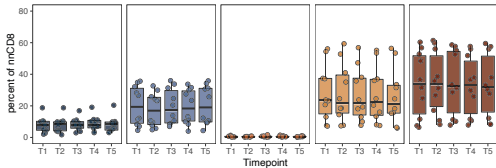

Healthy total non-naïve CD8+

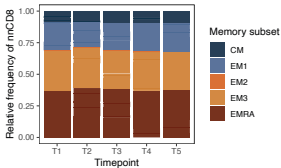

MS-aCD20 total non-naïve CD8+

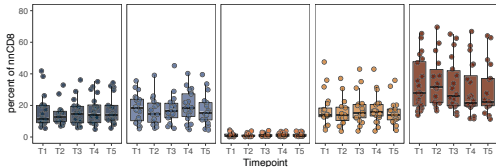

MS-aCD20 total non-naïve CD8+

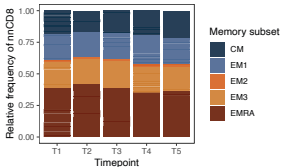

# Extended Data Figure 8.

## A

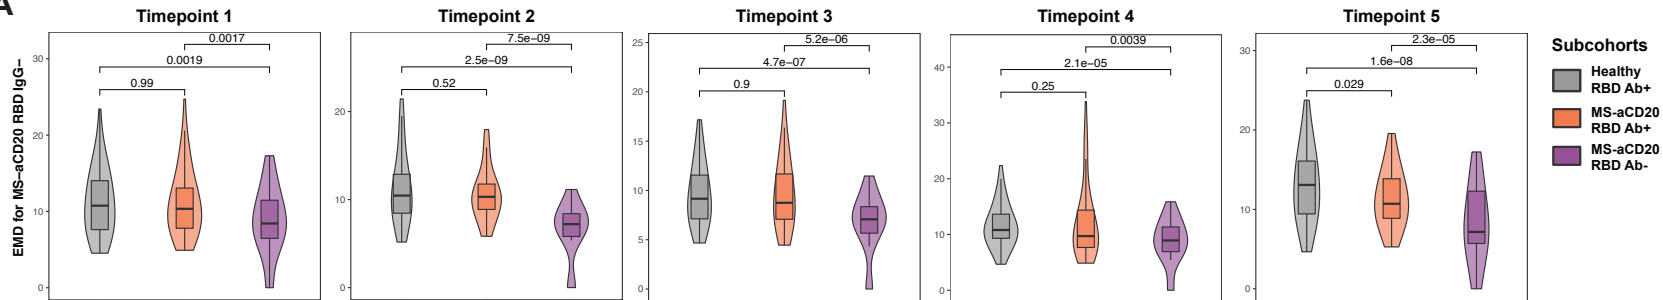

## B

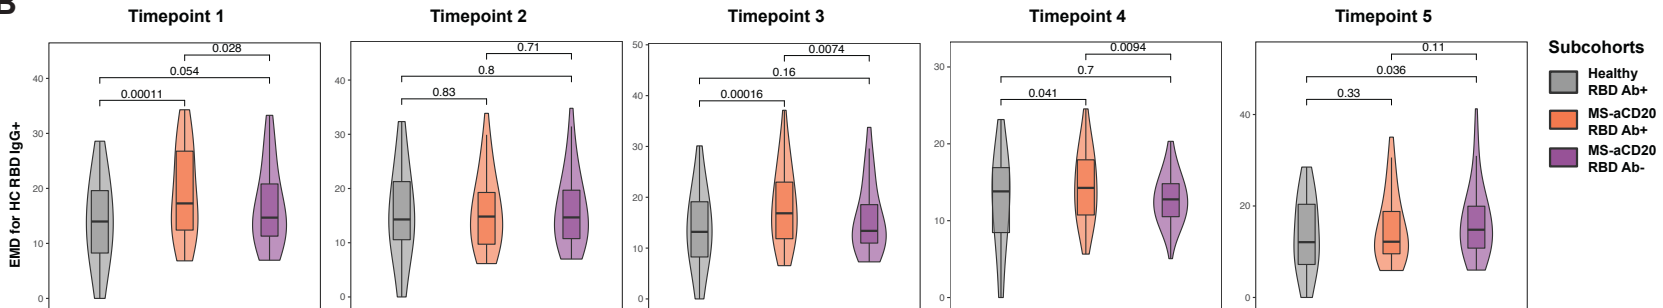

Supplement: Supplementary file [file media-1.pdf]
